# Supplementary material for: The Hepatoprotective Effect of Haoqin Qingdan Decoction against Liver Injury Induced by a Chemotherapeutic Drug Cyclophosphamide
Source: Hindawi journal article supplement (doi:10.1155/2015/978219), 2015-01-01

Fig S1

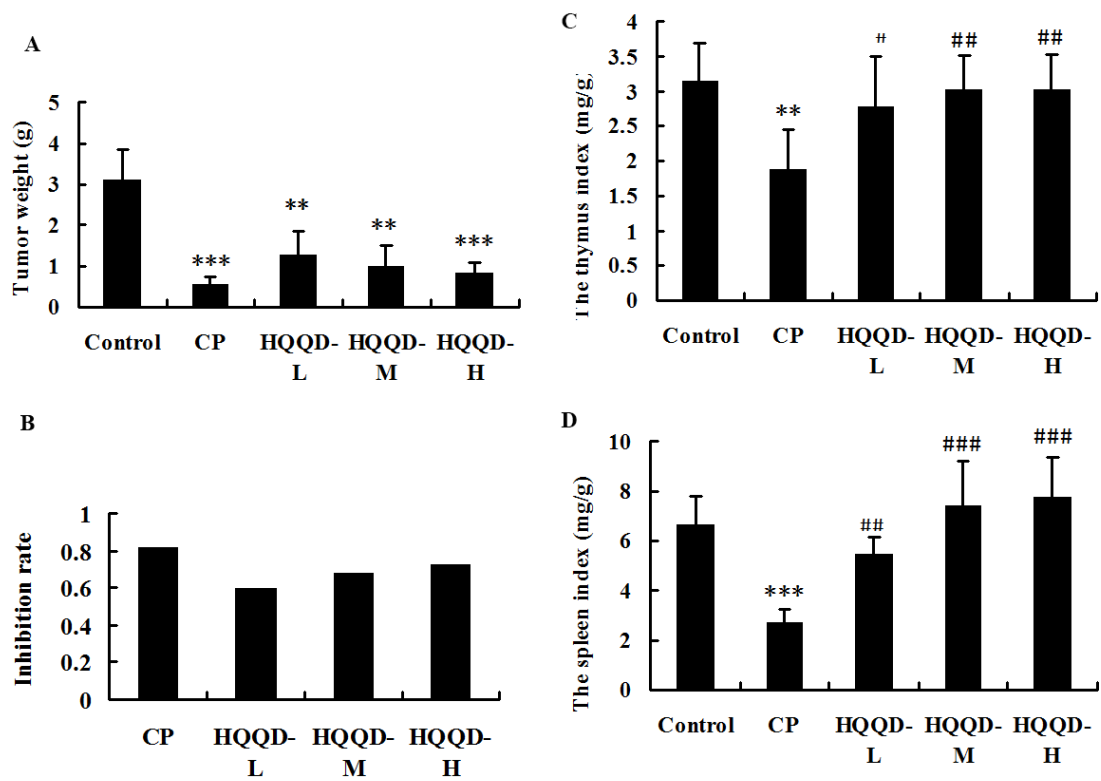

Supplement: f1 [file 978219.f1.pdf]
